# Supplementary material for: Corrole and nucleophilic aromatic substitution are not incompatible: a novel route to 2,3-difunctionalized copper corrolates
Source: Royal Society of Chemistry journal article supplement (doi:10.1039/c5ob00659g), 2015-01-01
Supplement: c5ob00659g1.pdf [file c5ob00659g1.pdf]

## Electronic Supplementary Information

### **“Corrole and nucleophilic aromatic substitution are not incompatible: a novel route to 2,3-difunctionalized copper corrolates”**

M. Stefanelli, <sup>\*a</sup> F. Mandoj,<sup>a</sup> S. Nardis,<sup>a</sup> M. Raggio,<sup>a</sup> F.R. Fronczek,<sup>b</sup> G.T. McCandless,<sup>c</sup> K. M. Smith,<sup>b</sup> and R. Paolesse<sup>a</sup>

[manuela.stefanelli@uniroma2.it](mailto:manuela.stefanelli@uniroma2.it); [kmsmith@lsu.edu](mailto:kmsmith@lsu.edu)

<sup>a</sup> *Dipartimento di Scienze e Tecnologie Chimiche, Università di Roma Tor Vergata, via della Ricerca Scientifica 1, 00133 Rome, Italy*

<sup>b</sup> *Department of Chemistry, Louisiana State University, Baton Rouge, LA 70803, USA*

<sup>c</sup> *Department of Chemistry, The University of Texas at Dallas, Richardson, TX 75080, USA.*

**Copies of <sup>1</sup>H NMR and FAB mass spectra**

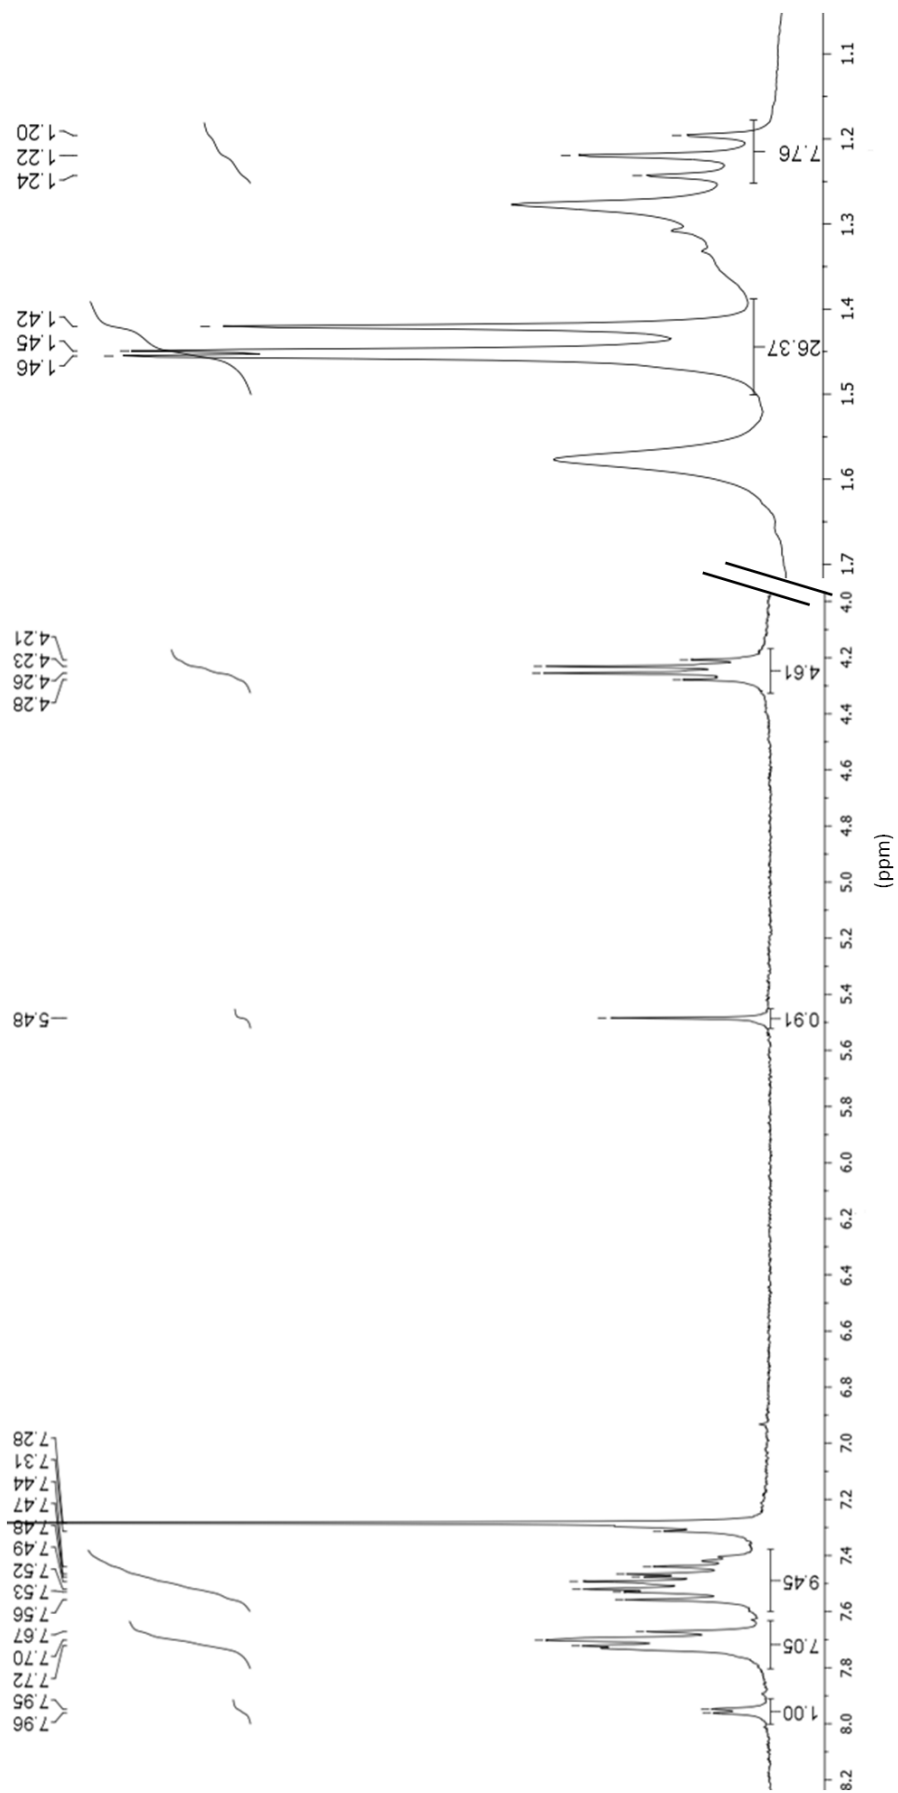

**Figure S1:**  $^1\text{H}$  NMR spectrum of 2-DEM-3NO<sub>2</sub>-TtBuPCorrCu(1)

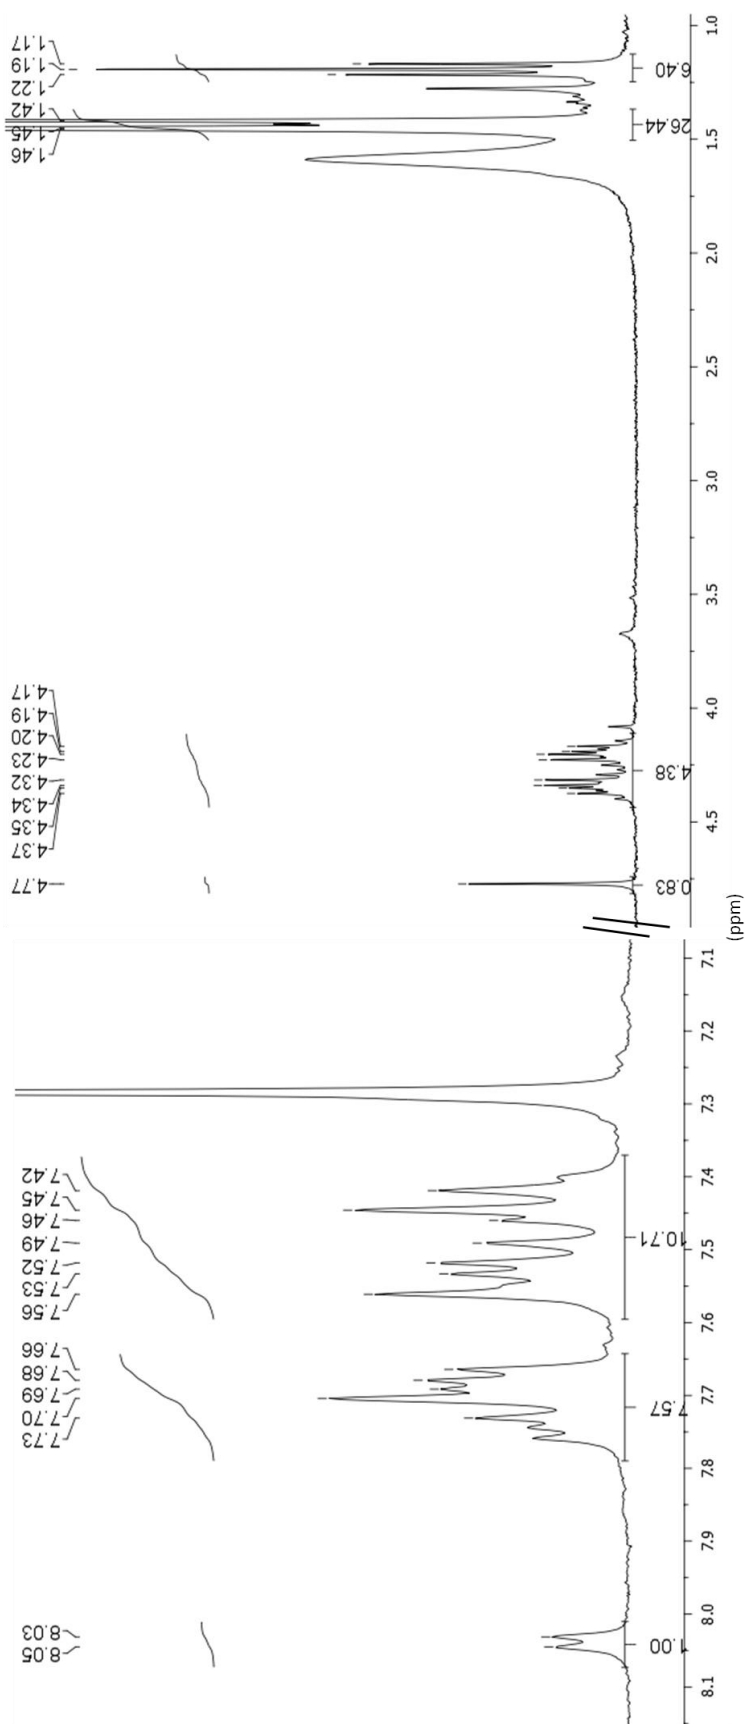

**Figure S2:** <sup>1</sup>H NMR spectrum of 2-DEM(OH)-3NO<sub>2</sub>-TtBuPCorrCu(2)

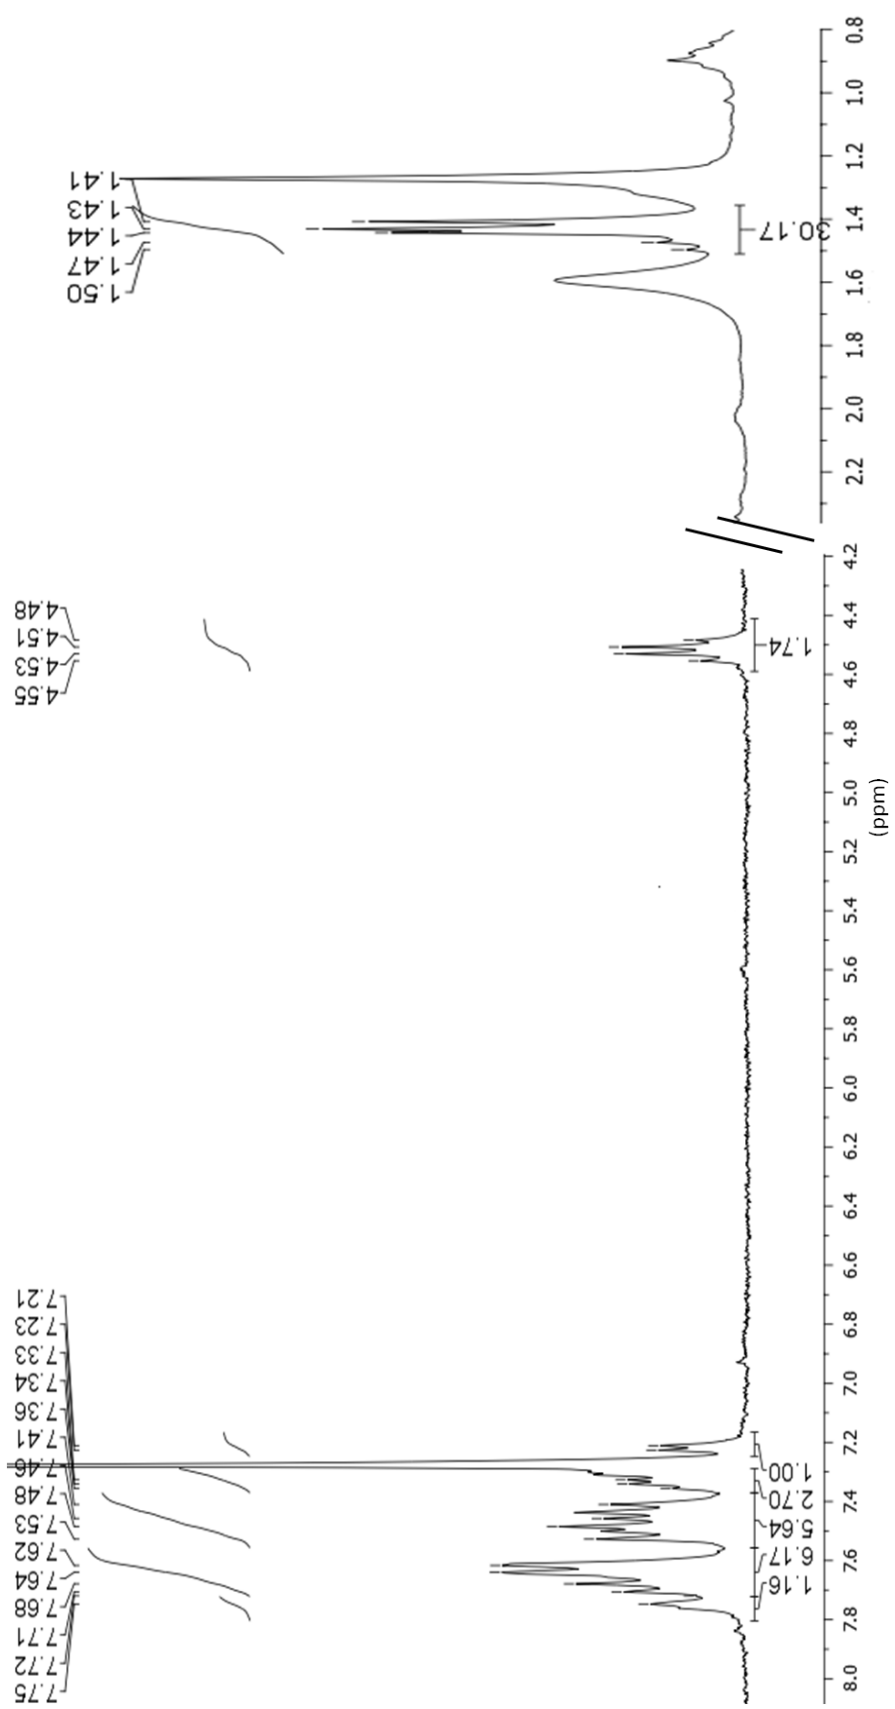

**Figure S3:**  $^1\text{H}$  NMR spectrum of 2-EtO-3-(NO<sub>2</sub>)TtBuCorrCu(3)

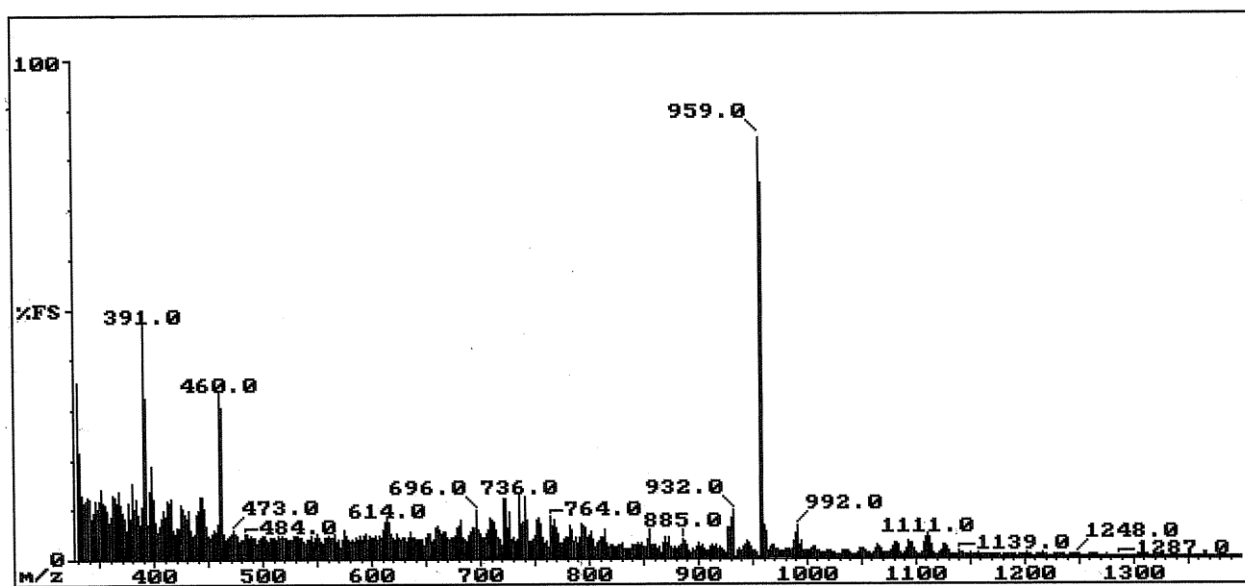

Figure S4: FAB mass spectrum of 2-DEM-3NO<sub>2</sub>-TtBuPCorrCu(1)

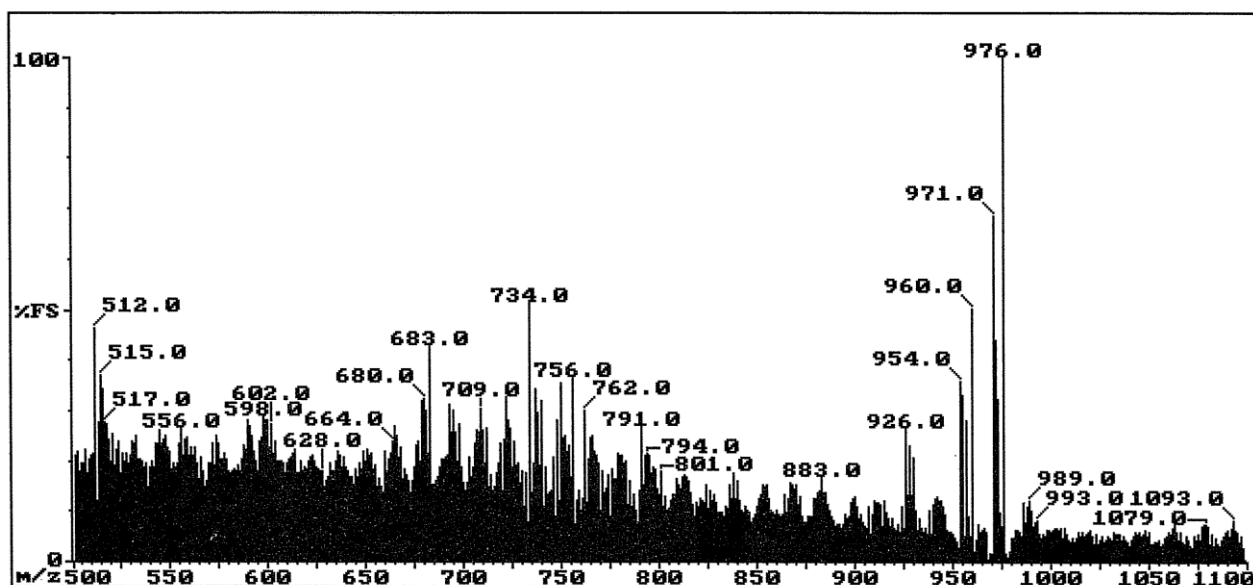

Figure S5: FAB mass spectrum of 2-DEM(OH)-3NO<sub>2</sub>-TtBuPCorrCu(2)

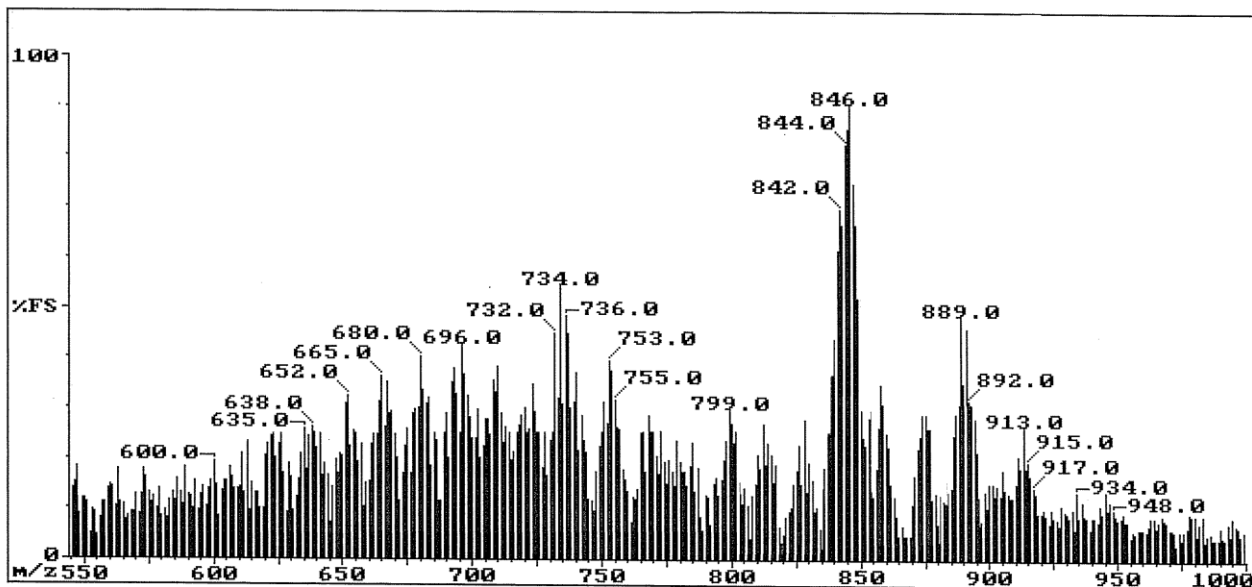

Figure S6: FAB mass spectrum of 2-EtO-3-(NO<sub>2</sub>)TtBuCorrCu(3)
